# Supplementary material
Source: MDPI journal article supplement (https://www.mdpi.com/2073-4441/9/8/586)
Supplement: s1 [file s1]

## Appendix

**Table S1.** Environmental policies and projects related to wastewater management in China

| Year      | Environmental regulations and projects                                                                                                                                                                                                                                                                                                                                                                                                                   |
|-----------|----------------------------------------------------------------------------------------------------------------------------------------------------------------------------------------------------------------------------------------------------------------------------------------------------------------------------------------------------------------------------------------------------------------------------------------------------------|
| -1986     | -Establishment of a standard for discharges of industrial wastewater, waste gas, and solid waste (1973)<br>-Environmental Protection Law (trial in 1979)<br>-Pollution levy regulation (1982)<br>-Marine Environment Protection Law (1982, revised in 1999)<br>-Law on the Prevention and Control of Water Pollution (1984, revised in 1996 and 2008)                                                                                                    |
| 1986-1990 | -The National Environmental Protection Agency was upgraded to an organization that reports directly to the state council (1988)<br>-Implementation of the law on Water Pollution Prevention and Control (1989)<br>-Environmental Protection Law (amended in 1989, revised in 2015)                                                                                                                                                                       |
| 1991-1995 | -The second national conference on the prevention and control of industrial pollution proposed the notion of “Three shifts” (1993)<br>-China’s Agenda 21 (1994)                                                                                                                                                                                                                                                                                          |
| 1996-2000 | -The national Ninth Five-Year Plan for Environmental Protection (1996)<br>-NEPA was upgraded to the State Environmental Protection Administration at the ministerial level (1998)<br>-Implementation of the People’s Republic of China’s law on water pollution prevention and control (2000)                                                                                                                                                            |
| 2001-2005 | -The State Environmental Protection Administration issued interim administrative measures to regulate discharge licenses for key water pollutants in the Huai River and the Tai Lake Basin (2001)<br>-The national Tenth Five-Year Plan for Environmental Protection (2001)<br>-Law on the promotion of cleaner production (2003)<br>-SEPA issued measures for preventing and controlling environmental pollution from unused hazardous chemicals (2005) |
| 2006-2010 | -Eleventh Five-Year Plan set the national target for COD emissions reduction (2006)<br>-Eleventh Five-Year Plan for the development of national water resources (2007)<br>-Implementation of a chemical oxygen demand emissions trading system (2007)<br>-Introduction of measures for sharing environmental information (2008)<br>-Circular economy promotion law (2008)                                                                                |
| 2011-2015 | -Twelfth Five-Year Plan set the national target for ammonia nitrogen (NH <sub>3</sub> -N) emissions reduction in wastewater (2011)<br>-Regulation on Urban Drainage and Sewage Treatment (2013)<br>-Water Pollution Prevention and Control Action Plan (Water Ten Plan) (2015)<br>-New environmental protection law was enforced (2015)                                                                                                                  |

Source: The authors revised Table 1 from Fujii et al. [17].

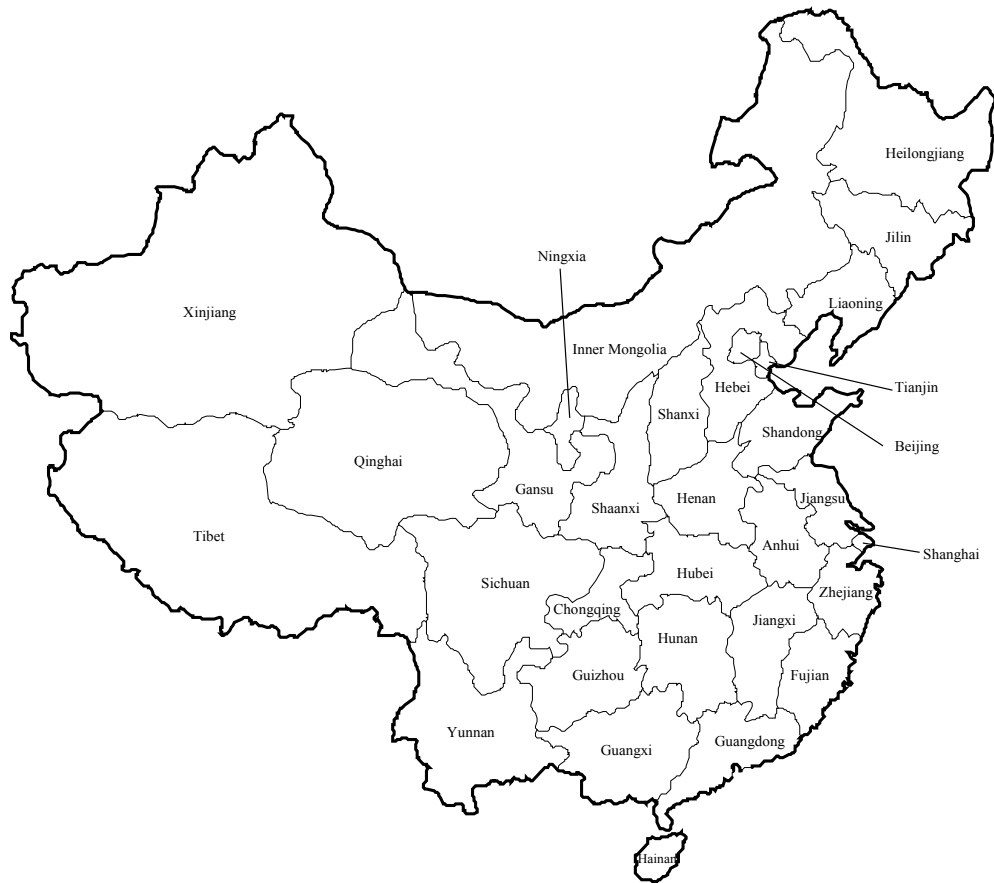

**Figure S1. Map of Mainland China**

Note: Regions are defined as follows.

Eastern region: Beijing, Tianjin, Hebei, Shanghai, Jiangsu, Zhejiang, Fujian, Shandong, Guangdong, Hainan

Northeastern region: Liaoning, Jilin, Heilongjiang

Central region: Shanxi, Anhui, Jiangxi, Henan, Hubei, Hunan

Western region: Inner Mongolia, Guangxi, Chongqing, Sichuan, Guizhou, Yunnan, Tibet, Shaanxi, Gansu, Qinghai, Ningxia, Xinjiang
